# Supplementary material for: MHC Class I Presented T Cell Epitopes as Potential Antigens for Therapeutic Vaccine against HBV Chronic Infection
Source: PubMed Central journal article supplement (PMC4058288; doi:10.1155/2014/860562), 2014-05-26
Supplement: 860562.f1.pdf [file 860562.f1.pdf]

TABLE 1: Identification of MHC class I restricted peptides derived from HBV that did not meet cutoff criteria. The selection criteria for peptides are as follows: Charge 1: XCorr > 1.6; Charge 2: XCorr > 1.8; Charge 3: XCorr > 2.0. Peptides that have a XCorr lower than the cutoff value are considered “low confidence” “low abundance” peptides. These peptides have been previously described [19].

| Peptide sequence  | Parent protein   | Accession ID | Charge | XCorr |
|-------------------|------------------|--------------|--------|-------|
| <b>FLPSDFFPSV</b> | Core protein     | gil16947     | 2      | 0.59  |
| DLLDTASALY        | Core protein     | gi62288052   | 2      | 1.05  |
| EYLVSFQVW         | Core protein     | gil6930336   | 2      | 0.98  |
| FLLSLGIHL         | P protein        | P03159       | 2      | 1.10  |
| FLLTRILTI         | Surface antigen  | gi329620     | 2      | 1.02  |
| ILLCLIFLL         | Surface antigen  | gi329620     | 2      | 1.01  |
| IPIPSSWAF         | S protein        | P03141       | 2      | 1.46  |
| LPSDFFPSV         | Core antigen     | gil16947     | 2      | 0.70  |
| LTFGRETVLEY       | Core protein     | gil6930336   | 2      | 0.69  |
| LVVDFSQFSR        | P protein        | gil18870     | 2      | 0.91  |
| LWFHISCLTF        | Core protein     | gil6930336   | 3      | 0.84  |
| QAFTFSPTYK        | P protein        | gi399401     | 2      | 1.24  |
| RFSWLSLLVPF       | P protein        | SRC7447      | 3      | 1.21  |
| RWMCLRRFII        | S protein        | gi62281      | 2      | 0.69  |
| STLPETTVVRR       | Core antigen     | P03146       | 2      | 1.03  |
| WLSLLVPFV         | Envelope protein | gil28168864  | 2      | 1.11  |
| WMMWYWGPSLY       | Surface antigen  | gi329620     | 3      | 1.04  |
| GLSRYVARL         | P protein        | gil18877     | 2      | 0.84  |
| HTLWKAGILYK       | P protein        | gil18870     | 3      | 1.76  |
